# Supplementary material for: The discovery of a key prenyltransferase gene assisted by a chromosome-level Epimedium pubescens genome
Source: PubMed Central journal article supplement (PMC9702526; doi:10.3389/fpls.2022.1034943), 2022-11-14
Supplement: DataSheet_1.pdf [file DataSheet_1.pdf]

*Supplementary Material*

## Contents

|                                                                                                                                                  |    |
|--------------------------------------------------------------------------------------------------------------------------------------------------|----|
| 1 Supplementary Figures .....                                                                                                                    | 1  |
| Figure S1. Microsynteny analysis of <i>E. pubescens</i> and other plant genomes. ....                                                            | 1  |
| Figure S2. Multiple sequence alignment of the amino acid sequences from EpPT8 and representative plants PTs. ....                                | 2  |
| Figure S3. The chemical structures of flavonoid substrates used in the enzymatic assays. ....                                                    | 3  |
| Figure S4. Determination of enzymatic products of the recombinant EpPT8 protein by liquid chromatography mass and tandem mass spectrometry. .... | 4  |
| Figure S5. <sup>1</sup> H NMR spectrum of the enzymatic product of EpPT8 catalyzed reaction with kaempferol as substrate. ....                   | 5  |
| 2 Supplementary Tables .....                                                                                                                     | 6  |
| Table S1. Karyotype and genome features of five <i>Epimedium</i> species. ....                                                                   | 6  |
| Table S2. The location record for wild populations of <i>E. pubescens</i> in China. ....                                                         | 7  |
| Table S3. Sequencing data used for <i>E. pubescens</i> assembly. ....                                                                            | 8  |
| Table S4. Summary of raw ONT data. ....                                                                                                          | 8  |
| Table S5. Annotations of <i>E. pubescens</i> genome. ....                                                                                        | 9  |
| Table S6. Twelve plant species used in comparative genomic analyses. ....                                                                        | 10 |
| Table S7. PCR primers for the amplification of different EpPT8 constructs. ....                                                                  | 10 |
| Table S8. Summary of assembled contigs from ONT data. ....                                                                                       | 11 |
| Table S9. Characteristics of pseudo-chromosomes by Hi-C. ....                                                                                    | 11 |
| Table S10. Exon statistics from predicted gene models. ....                                                                                      | 12 |
| Table S11. Non-coding RNAs in <i>E. pubescens</i> genome. ....                                                                                   | 12 |
| Table S12. Identification of repetitive elements in <i>E. pubescens</i> genome. ....                                                             | 13 |
| Table S13. LTR copia and LTR gypsy in 6 pseudo-chromosomes. ....                                                                                 | 15 |
| Table S14. BUSCO evaluation of <i>E. pubescens</i> genome. ....                                                                                  | 15 |
| Table S15. PTs of the UbiA superfamily used in the phylogenetic tree. ....                                                                       | 16 |
| Table S16. Comparison of enzymatic activity between EsPT2 and EpPT8. ....                                                                        | 18 |

## 1 Supplementary Figures

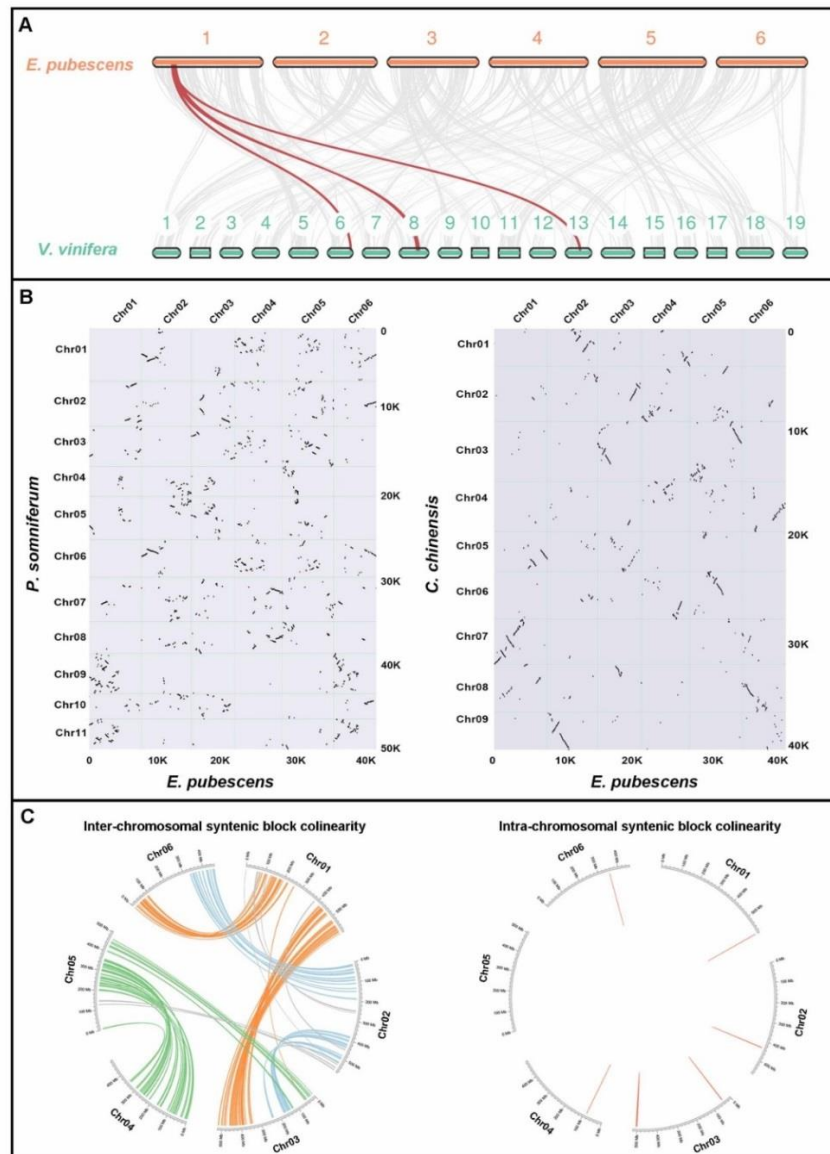

**Figure S1. Microsynteny analysis of *E. pubescens* and other plant genomes.** (A) Microsynteny analysis between *E. pubescens* and *V. vinifera* genome. The syntenic block on chromosome 1 of *E. pubescens* corresponds to three syntenic blocks on chromosomes 6, 8 and 13 of *V. vinifera*, respectively. (B) Dot plots of orthologues between *E. pubescens* and *P. somniferum* (left), and between *E. pubescens* and *C. Chinensis* (right). (C) Syntenic block collinearity plots. Left, inter-chromosomal syntenic block collinearity plot, Chr01-Chr06 and Chr01-Chr03 with orange lines, Chr02-Chr06 and Chr02-Chr03 with light blue lines, Chr03-Chr05 and Chr04-Chr05 with green lines; right, intra-chromosomal syntenic block collinearity plot, dark red lines for syntenic blocks on the same chromosome.

|           |                                                                              |     |
|-----------|------------------------------------------------------------------------------|-----|
| EpPT8     | MVSR-----CASPSFSITKYTPHQGSLLELKPFS SQKPGTRIPYKLGQNDI SCALRKHSHPTLHT          | 62  |
| EsPT2     | MVSR-----CASPSFSITKYTPHQGSLLELKPFS SQKPGTRIPYKLGQNDI YCALRKHSHPTLHT          | 62  |
| LaPT2     | MGFV---LAATSF PKAPSF TSGRSSWNSKEYTKN--YYASSHVITLWHKTGII QKEPCFMMAWPQNLKLLH   | 65  |
| SfPT      | MGSM---LLAS-FPGASSITTTGGSCMRSKQYAKN--YNASSVYVTLWKKKGKIQKEHCAVIFSKHNLKQH      | 64  |
| GmG2DT    | MDSG---SVISST-SACSITTTGGNLWRRKHSTNNIYYASSCASAKASKYKKTQIECNILRSQSSLNHH        | 65  |
| GmG4DT    | MDWG---LAISSHPKYPSYVTTGGNLWRSKHHTKNIYFASSWISKASRHKRETQIEHNVLRFGQSSLDH        | 66  |
| GuA6DT    | MAKNSLNPI SFFGQKERHSPSFGGN IWSOSNTKN--YYASSYAPKASWHKKNIQKEYFFLRFKQSSSNHL     | 69  |
| MalDT     | MELS---ISHSSLRLPAIIPQRCKASSHEKRLFSIKPTTKNIKSNF PSCNSTANKLILPLGLYGERKL        | 66  |
| Consensus | M-S---LA-SS---AYSITTTGGN-WRSK-TTKN-YYASSYVTKASYKKKQSQIE---ILR--QTSL-HH       | 70  |
| EpPT8     | H-----EKELELFKDKNPTRENPCPSATSSSENAPLSFSTKLDWFIKFRPYATIG--IIGNTICM            | 119 |
| EsPT2     | H-----EKELELFKDKNPTRENPCPSATSSSENAPSSFSSTKLDWFIKFRPYATIG--IIGNTICM           | 119 |
| LaPT2     | CKYKGGD---KRNYYMNAASGKSNYEYETQDLDRNNWGLINALHYFFRFIRPTATLS-LLLGATLT           | 128 |
| SfPT      | YKNEGGSTSKKREKKYTVNAISEESFEYEPQVRDPEISVGSVNDALDFTYKFCRYPAMFS-IVLGATFK        | 133 |
| GmG2DT    | YKRLEGGATYQDCDKKYVYKAPEPTFDSEPCASNPENNVVSAKKILDVYFHFYCPYSMIA--ILLCAISS       | 134 |
| GmG4DT    | YKCIRGGSTYQECNRKFFVYKA SKQPLGFEAHSNPKNILSVKNVLSAFYWFYPTMIG--ITLCAFS          | 135 |
| GuA6DT    | YKDLEGGSTYRECNRYKYVKAAPGPSFESESPAFDSKNILESVKNFINVFFKILSPYAMIA--AALSITSA      | 138 |
| MalDT     | SKSLLYG---QHRRNSTTIRASAEAEHSANNSDGTFAKFSFSGSALYKFLRIYALSHITVSTVSLF           | 129 |
| Consensus | YK-I-QGST-QE-EKKYVYKA-SK-S-E-EP-ATNSEN--SVSN-LDVYFYKFRPYAMIS-IILSAT-S        | 140 |
| EpPT8     | CILPVOTMADLSPKFFIGVAQAIASMYLMNLFNVAVNOQYDVEIDKYNKPYLPASGGVSMTSATLFTIL        | 189 |
| EsPT2     | CILPVOTMADLSPRFIFIGVAQAIASMYLMNLFNVAVNOQYDVEIDKYNKPYLPASGGVSMTSATLFTIL       | 189 |
| LaPT2     | TLLAVEKLSDISAAYF IGLQVYVSSCMQVFMAGLNQLDYDEIDKINPKYLPVSGELPKNGVITVAT          | 198 |
| SfPT      | SFVAVEKLSDSLTFEFGWLQVYVAVICIHIFGVGLNQLCDIEIDKINPKDLPASGKLSFRNVITAS           | 203 |
| GmG2DT    | SLLAVEKPSDISSSFLIGVLQALVPHLFAVFANVNOQYDVEIDKINPKYLPASGGVLSFTTAVFIAS          | 204 |
| GmG4DT    | SLLAVEKLSDISLSFLIGVLQGLVLPQLFIEIYLCGVNQLDYDEIDKINPKPLMASGGVFSFKTVIISAA       | 205 |
| GuA6DT    | SLLAVEKLSDISPQFF IGLQGLIPNIFMGVYVAGLNQLCDIEIDKINPKPLASGGEISFTTGVITIAS        | 208 |
| MalDT     | ARLVENPHLFWKSLV LKAFPGLIAMTLANAYYIGINQIYDADIDKYNKPYLP IPAGELSLKHAWLVIS       | 199 |
| Consensus | SLLAVEKMSDIS-SFFIGVLQ-IVSMI-MNVF-VGVNQLDYDEIDKINPKYLPASGELSFTNAVITAS         | 210 |
| EpPT8     | TAALSIALGYFSSP-ALFYGSI AFFLSASAYSNFPLLRWKN--ALGAIISLMLWGISLQTVGFHHIQQY       | 257 |
| EsPT2     | TAALSIALGYFSSP-ALFYGSI AFFLSASAYSNFPLLRWKN--ALGAIISLMLWGISLQTVGFHHIQQY       | 257 |
| LaPT2     | TFILGHLPFLIGSGPLFWSYVSSSLAIAYCADLPLLRWKRHSALTALNYIDLGGYKPLGYVLMQTY           | 268 |
| SfPT      | SLILGLGFAWIVGSWPLFWTVLICCFTAAVYDLP LLRWKPYVLTAINF ADVAVTRSLGFLFHMQTC         | 273 |
| GmG2DT    | LLINISFWLSLVIGSWPLIWNVYVLTSSVWNYYSINVP LLRWKRHPFLATICTISYWAFILPITFLFHMQTF    | 274 |
| GmG4DT    | FLALISFGFTWITGSWPLICNLVYIAS5WTAYSIDVPLLRWKRYPFVAAACMISTWALALPISYFHHMQTY      | 275 |
| GuA6DT    | SFIVSLWLGSI VGSWPSLWALISFCVITWTGYSVNVP LLRWKRHPALAAACI IATWGFIFPIGYFLH I QTF | 278 |
| MalDT     | FAYGALSILRLMNA-DWITTSIFCFGLFLAHFY SAPP LRFKQSP IATSIVNPLNAGIVHNLG-LIYATRA    | 267 |
| Consensus | T-I LSL-L-WI VGSWPLFWSLI---LLWTAYSVNVPLLRWKRHPAL-AI-SIM-WGIVLPLGYFLHMQTY     | 280 |
| EpPT8     | VLGKPMVLKNSFIYAIIFQSLFSIVYATIKDLPDVEGDKANGSTNLTILIGKEKVFWGCTSLMLATIYIGT      | 327 |
| EsPT2     | VLGKPMVLKNSFIYAIIFQSLFSIVYATIKDLPDVEGDKANGSTNLTILIGKEKVFWGCTSLMLATIYIGT      | 327 |
| LaPT2     | VFKRPPFSRPLIFCMAMSSYFAIIIAIFKIDTDMEGDEKFKIKSLSLHLGKKPVFVCSVLLQMATYVA         | 338 |
| SfPT      | VFKRPTTFPRPLIFCTAIVSYIYAVIALFKIDPDMEGDEKFKIQSLSLRGPKRVFVCSVLLQMATYVGT        | 343 |
| GmG2DT    | VLKRPVYFPRSLIFVYVFMIFVSLGALS KDISDYKGDKAYGIDTLAIRLGOKWYFWICILFEMAFGVA        | 344 |
| GmG4DT    | VLKRPVGFPRSLGFLVAFMIFVSLGALS KDISDYKGDKAYGIDTLAIRLGOKWYFWICILFEMAFGVA        | 345 |
| GuA6DT    | VFKRSVFSRPFVYFSTIFMSFFSLVIALFKIDIPDI EGGDAFGVQSFASLGGKRVFVCSVLLQMATYVA       | 348 |
| MalDT     | SLGLPFVWNPSTLFI VNFITPFFLAITNLKDLTDMEGDSKHNIRTLPTIYGPRIITFFVGMLLTHYVAA       | 337 |
| Consensus | VLKRPVMF-RSLIF-VVFM SLFSIVIAL-KDIPDVEGDKAHG IQSLSI-LGKKKVFVCSVLLQMATYVA      | 350 |
| EpPT8     | AAFGATLPILKNKLVTMVAHSA LAVFLWLQAKQIDLA--DDASTQSYLLMWKLCNIEYLLIPFVG           | 391 |
| EsPT2     | AAFGATLPILKNKLVTMVAHSA LAVFLWLQAKQIDLA--DDASTQSYLLMWKLCNIEYLLIPFVG           | 391 |
| LaPT2     | ILMGTLSPLFWYKIAMGLGHGILASLVSYANSVDLK--SNPAIQSFYMFVWKLITVEYFLIPLFR            | 402 |
| SfPT      | ILVGTSPILWSKIIIVLGHAVLASVWYHAKSVDLT--SNVVLQSFYMFVWKLHTADYFLIPLFR             | 407 |
| GmG2DT    | LLAGATSSYLWIKIVTGLGHAILASILLYQAKSIYLS--NKVSTISFYMLVWKLLYAAYFLMALIR           | 408 |
| GmG4DT    | ILAGATSSCHFWTKIFVTGMNAV LASILWYQAKSVDLS--DKASTGSFYMFVWKLLYAGFLMALIR          | 409 |
| GuA6DT    | LLMGATSSCLWSKIIIVLGHAILALVLFYRAKSNLK--SKASTIASFFMFVWKLLYAAYFLVPLVR           | 412 |
| MalDT     | ALAGILLFKVFNPPYMAPAHA I LGLLFLKTRLEDKANYVVEASETFYKFIWKLILLEFVIFPFI-          | 402 |
| Consensus | IL-GATSP-LWNLKIVTMLGHA I LASILWYQAKSIDLA--SNASTQSFYMFVWKL--AEYFLIPLIR        | 416 |

**Figure S2. Multiple sequence alignment of the amino acid sequences from EpPT8 and representative plants PTs.** The sequence similarity was illustrated by the sequence alignment and the amino acids were labeled with the colors of red, green and black (high, medium and low identity, respectively); the conserved motifs of PTs, N(Q/D)xxDxxxD and KDxxDx(D/E)GD were highlighted in blue boxes; the nine blue stars denote the difference of amino acid between EpPT8 and EsPT2; the representative plant PTs were described in Supplementary Table 15.

|                 |                                                                                     |                                                                                                                                                                                                                                                                                                                                                                                                                   |
|-----------------|-------------------------------------------------------------------------------------|-------------------------------------------------------------------------------------------------------------------------------------------------------------------------------------------------------------------------------------------------------------------------------------------------------------------------------------------------------------------------------------------------------------------|
| Chalcone        | 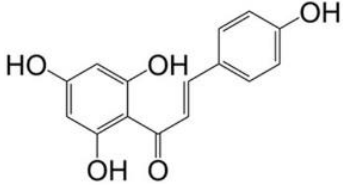   | Naringenin chalcone                                                                                                                                                                                                                                                                                                                                                                                               |
| Flavonols       |    | $R_1 = \text{H}, R_2 = \text{H}, R_3 = \text{H}$ , Kaempferol<br>$R_1 = \text{OH}, R_2 = \text{H}, R_3 = \text{H}$ , Quercetin<br>$R_1 = \text{OH}, R_2 = \text{H}, R_3 = \text{OH}$ , Myricetin<br>$R_1 = \text{H}, R_2 = \text{CH}_3, R_3 = \text{H}$ , Kaempferide<br>$R_1 = \text{OH}, R_2 = \text{CH}_3, R_3 = \text{H}$ , Tamarixetin<br>$R_1 = \text{OH}, R_2 = \text{CH}_3, R_3 = \text{OH}$ , Mearnsetin |
| Flavone         |   | $R_1 = \text{H}, R_2 = \text{H}$ , Apigenin<br>$R_1 = \text{OH}, R_2 = \text{H}$ , Luteolin<br>$R_1 = \text{OH}, R_2 = \text{OH}$ , Tricetin<br>$R_1 = \text{OCH}_3, R_2 = \text{OCH}_3$ , Tricin                                                                                                                                                                                                                 |
| Dihydroflavone  |  | $R_1 = \text{H}, R_2 = \text{H}$ , Liquiritigenin<br>$R_1 = \text{H}, R_2 = \text{OH}$ , Naringenin<br>$R_1 = \text{OH}, R_2 = \text{OH}$ , Eriodictyol                                                                                                                                                                                                                                                           |
| Dihydroflavonol |  | $R_1 = \text{H}, R_2 = \text{H}$ , Dihydrokaempferol<br>$R_1 = \text{H}, R_2 = \text{OH}$ , Dihydroquercetin<br>$R_1 = \text{OH}, R_2 = \text{OH}$ , Dihydromyricetin                                                                                                                                                                                                                                             |

**Figure S3. The chemical structures of flavonoid substrates used in the enzymatic assays.** The classes and chemical structures of flavonoid substrates used in the enzymatic assays with the recombinant EpPT8 proteins expressed in yeast cells.

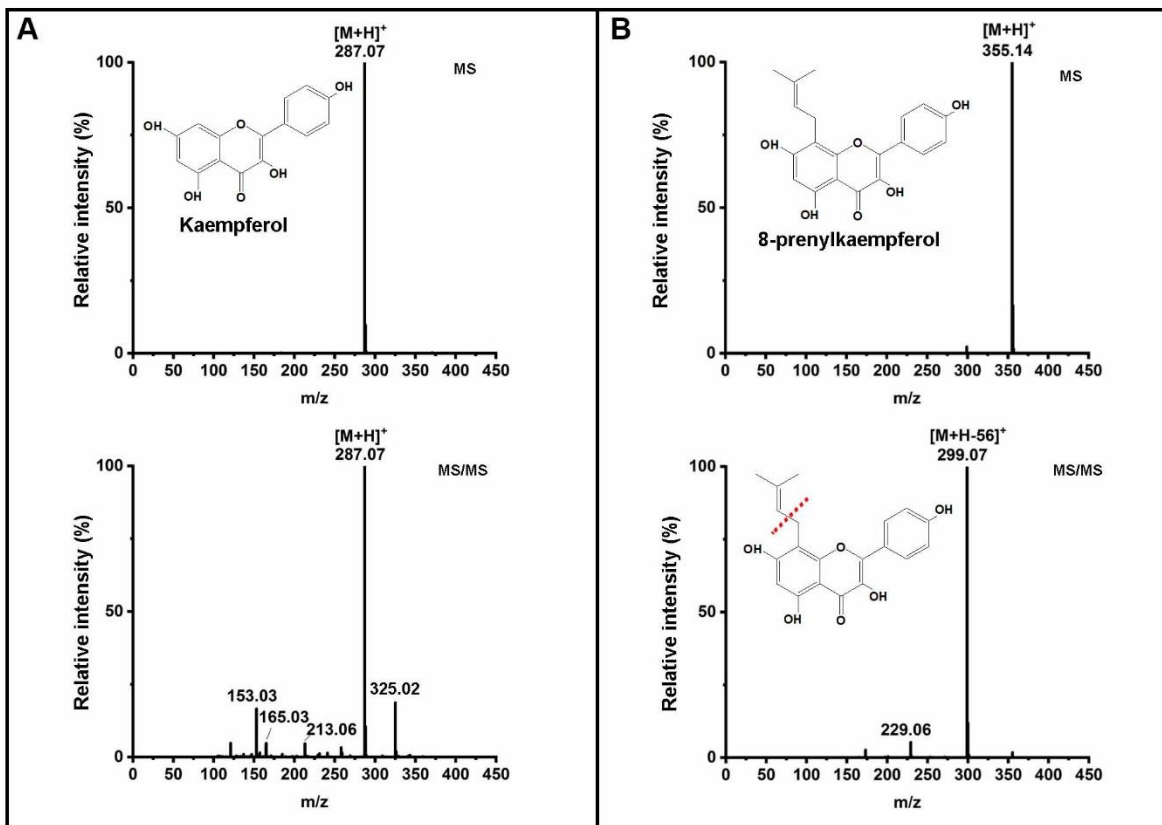

**Figure S4. Determination of enzymatic products of the recombinant EpPT8 protein by liquid chromatography mass and tandem mass spectrometry.** (A) The MS (upper) and MS/MS (lower) chromatograms of the substrate, kaempferol. (B) The MS (upper) and MS/MS (lower) chromatograms of the enzymatic product, 8-prenylkaempferol.

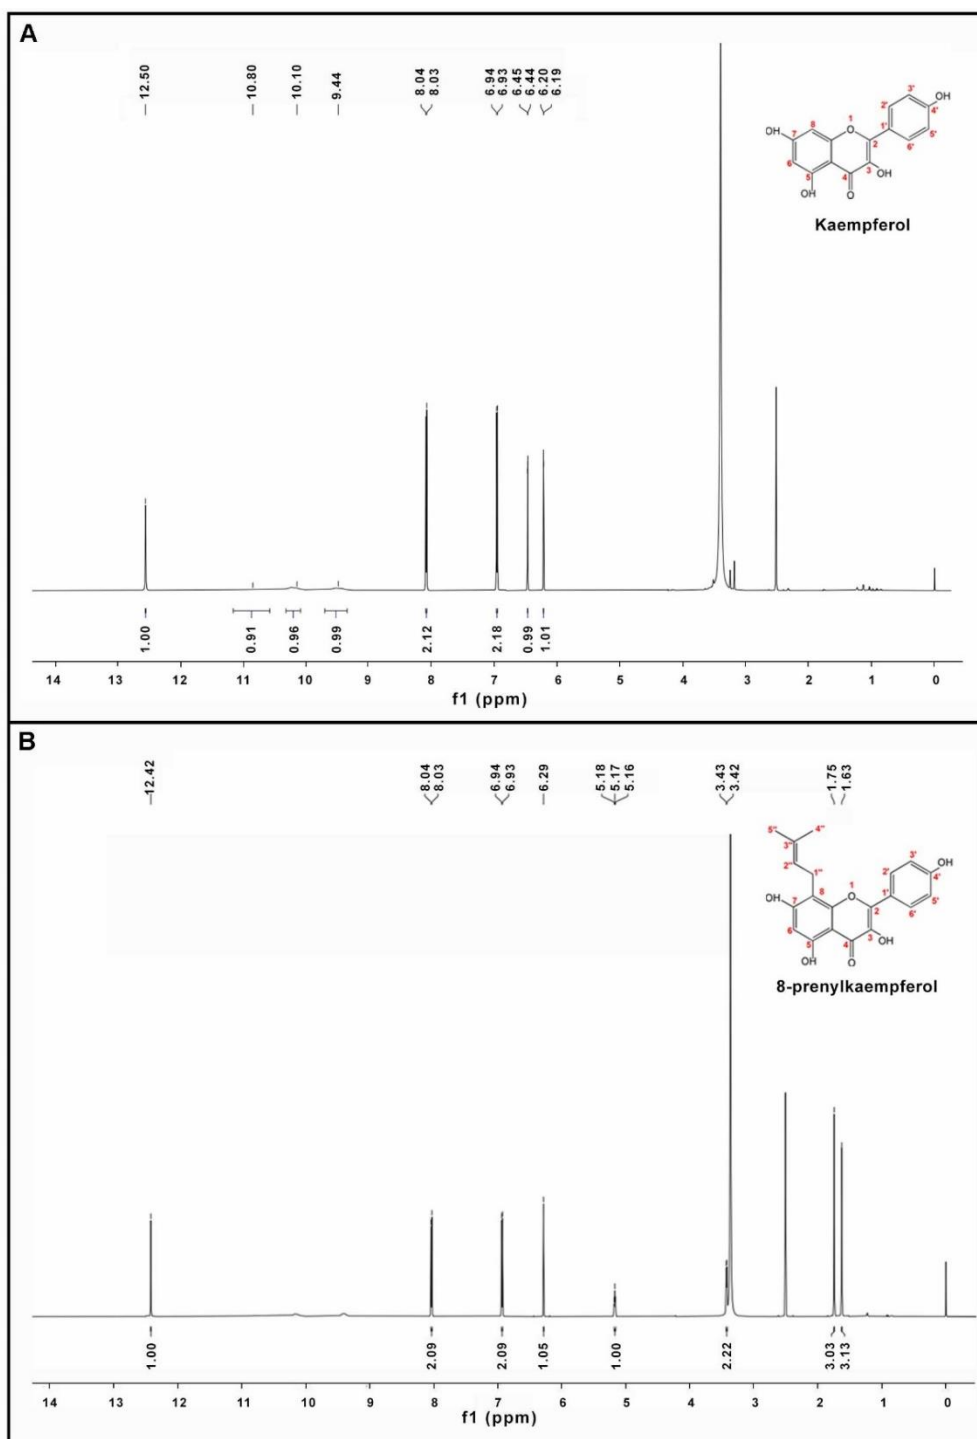

**Figure S5.**  $^1\text{H}$  NMR spectrum of the enzymatic product of EpPT8 catalyzed reaction with kaempferol as substrate. (A)  $^1\text{H}$  NMR (600 MHz) spectrum of kaempferol in  $\text{DMSO-}d_6$ . (B)  $^1\text{H}$  NMR (600 MHz) spectrum of 8-prenylkaempferol in  $\text{DMSO-}d_6$ . The inserts illustrated their chemical structures, respectively.

## 2 Supplementary Tables

**Table S1. Karyotype and genome features of five *Epimedium* species.**

| Taxa                                               | Converted genome size (Gb/1C) | Chromosome number (2n) | Karyotype classification | Karyotype symmetry | Reference                                |
|----------------------------------------------------|-------------------------------|------------------------|--------------------------|--------------------|------------------------------------------|
| <i>Epimedium brevicornu</i> Maxim.                 | 3.14                          | 12                     | 4m (2sat) + 8sm          | 2A                 | (Zhang, 2018; Zhang et al., 2018)        |
| <i>Epimedium sagittatum</i> (Sieb. Et Zucc.) Maxim | 4.24                          | 12                     | 6m (2sat) + 6sm          | 2A                 | (Chen et al., 2012)                      |
| <i>Epimedium pubescens</i> Maxim.                  | 4.43                          | 12                     | 6m (2sat) + 4sm+2st      | 2A                 | (Chen et al., 2012; Zhang et al., 2008)  |
| <i>Epimedium koreanum</i> Nakai                    | 4.10                          | 12                     | 6m (2sat) + 6sm          | 2A                 | (Zhang et al., 2018; Zhang et al., 2008) |
| <i>Epimedium wushanense</i> T. S. Ying             | 4.49                          | 12                     | 6m (2sat) + 6sm          | 2A                 | (Chen et al., 2012; Zhang et al., 2018)  |

**Note:** Karyotype classification includes m, median region; sm, submedian region; st, subterminal region; the original data of genome size unit was converted according to 1 pg = 978 Mb (Chen et al., 2012).



**Table S2. The location record for wild populations of *E. pubescens* in China.**

| Record No. | Species             | Location                                      | Longitude | Latitude |
|------------|---------------------|-----------------------------------------------|-----------|----------|
| 1          | <i>E. pubescens</i> | Baoxing county, yaan, Sichuan Province        | 102.82061 | 30.38835 |
| 2          | <i>E. pubescens</i> | Yucheng district, Yaan, Sichuan Province      | 103.11986 | 29.58355 |
| 3          | <i>E. pubescens</i> | Yucheng district, Yaan, Sichuan Province      | 103.03993 | 29.90817 |
| 4          | <i>E. pubescens</i> | Yucheng district, Yaan, Sichuan Province      | 102.98368 | 30.23822 |
| 5          | <i>E. pubescens</i> | Jianwei county, Leshan, Sichuan Province      | 103.93844 | 29.25571 |
| 6          | <i>E. pubescens</i> | Shizhong district, GongLai, Sichuan Province  | 103.19144 | 30.26062 |
| 7          | <i>E. pubescens</i> | Ermei Mountain, Sichuan Province              | 103.35633 | 29.57442 |
| 8          | <i>E. pubescens</i> | Chongzhou, Sichuan Province                   | 103.54000 | 30.82141 |
| 9          | <i>E. pubescens</i> | Pengcheng, Sichuan Province                   | 103.91928 | 31.19608 |
| 10         | <i>E. pubescens</i> | Shuangliu district, Chendu, Sichuan Province  | 104.15686 | 30.30769 |
| 11         | <i>E. pubescens</i> | Dujiangyan district, Chendu, Sichuan Province | 103.36627 | 31.00452 |
| 12         | <i>E. pubescens</i> | JinTang county, Chengdu, Sichuan Province     | 104.48548 | 30.76636 |
| 13         | <i>E. pubescens</i> | Longquanze district, Chendu, Sichuan Province | 104.16692 | 30.30853 |
| 14         | <i>E. pubescens</i> | Hongya county, Meishan, Sichuan Province      | 103.10567 | 29.54398 |
| 15         | <i>E. pubescens</i> | Qingshen country, Meishan, Sichuan Province   | 103.87124 | 29.77207 |
| 16         | <i>E. pubescens</i> | Beichuan county, Mianyang, Sichuan Province   | 104.59590 | 31.93521 |
| 17         | <i>E. pubescens</i> | Pingwu county, Mianyang, Sichuan Province     | 104.75149 | 32.41079 |
| 18         | <i>E. pubescens</i> | Longchang county, Neijiang, Sichuan Province  | 104.64770 | 29.73899 |
| 19         | <i>E. pubescens</i> | Hejiang county, Luzhou, Sichuan Province      | 105.83753 | 28.81850 |
| 20         | <i>E. pubescens</i> | Anyue county, Ziyang, Sichuan Province        | 105.36226 | 30.11038 |
| 21         | <i>E. pubescens</i> | Jiange county, Guangyuan, Sichuan Province    | 105.28069 | 32.04828 |
| 22         | <i>E. pubescens</i> | Cangxi county, Guangyuan, Sichuan Province    | 105.94140 | 31.73908 |
| 23         | <i>E. pubescens</i> | Qingchuan county, Guangyuan, Sichuan Province | 104.83319 | 32.52969 |
| 24         | <i>E. pubescens</i> | Nanjiang county, Bazhong, Sichuan Province    | 106.48425 | 32.40037 |
| 25         | <i>E. pubescens</i> | Bazhong county, Bazhong, Sichuan Province     | 106.75352 | 31.94683 |
| 26         | <i>E. pubescens</i> | Enyang district, Bazhong, Sichuan Province    | 106.63709 | 31.79759 |
| 27         | <i>E. pubescens</i> | Langzhong, Sichuan Province                   | 106.44756 | 32.09486 |
| 28         | <i>E. pubescens</i> | Dazu county, Chongqing                        | 105.70735 | 29.55004 |
| 29         | <i>E. pubescens</i> | Tongnan County, Chongqing                     | 105.77277 | 29.85159 |
| 30         | <i>E. pubescens</i> | Cheng County, Gansu Province                  | 105.38433 | 33.43912 |
| 31         | <i>E. pubescens</i> | Nanzheng district, Hanzhong, Shanxi Province  | 106.33866 | 32.46858 |
| 32         | <i>E. pubescens</i> | Liuba county, Hanzhong, Shanxi Province       | 106.93690 | 33.61961 |
| 33         | <i>E. pubescens</i> | Ningqiang county, Hanzhong, Shanxi Province   | 106.26286 | 32.83295 |
| 34         | <i>E. pubescens</i> | Mian county, Hanzhong, Shanxi Province        | 106.67950 | 33.16002 |
| 35         | <i>E. pubescens</i> | Lueyang county, Hanzhong, Shanxi Province     | 106.16325 | 33.33336 |
| 36         | <i>E. pubescens</i> | Yang county, Hanzhong, Shanxi Province        | 107.55209 | 33.22917 |
| 37         | <i>E. pubescens</i> | Taibai Mountain, Shanxi Province              | 107.82156 | 34.06204 |
| 38         | <i>E. pubescens</i> | Shiquan county, Ankang, Shanxi Province       | 108.25452 | 33.04482 |
| 39         | <i>E. pubescens</i> | Yang county, shangluo, Shanxi Province        | 109.70686 | 33.50044 |

**Note:** Wild populations were sampled at the field trips during 2018-2019.

**Table S3. Sequencing data used for *E. pubescens* assembly.**

| Sequencing type     | Number of reads | Average read length (bp) | Estimated coverage |
|---------------------|-----------------|--------------------------|--------------------|
| Illumina paired end | 5,521,463,927   | 150                      | 230.94 ×           |
| Oxford Nanopore     | 48,010,544      | 20,267                   | 271.32 ×           |
| Hi-C                | 1,965,567,758   | 150                      | 94.88 ×            |

**Note:** Hi-C, High-through chromosome conformation capture.

**Table S4. Summary of raw ONT data.**

| Raw ONT feature             | Size (bp)       | Number     |
|-----------------------------|-----------------|------------|
| Average length              | 20,267          | N/A        |
| N90                         | 15,233          | 28,139,216 |
| N80                         | 19,643          | 22,552,532 |
| N70                         | 23,653          | 18,046,283 |
| N60                         | 27,725          | 14,249,100 |
| N50                         | 31,921          | 10,979,770 |
| Longest                     | 1,363,653       | N/A        |
| Total sequencing size       | 973,018,880,629 | N/A        |
| Total number ( $\geq 2$ kb) | N/A             | 39,251,621 |

**Note:** ONT, Oxford Nanopore Technology; N/A, Not Available.

**Table S5. Annotations of *E. pubescens* genome.**

| <b>Database</b> | <b>Gene number</b> | <b>Percentage</b> |
|-----------------|--------------------|-------------------|
| GO              | 35,485             | 79.35%            |
| KEGG            | 33,202             | 74.24%            |
| KOG             | 25,592             | 57.22%            |
| Pfam            | 35,782             | 80.01%            |
| Swissprot       | 33,911             | 75.83%            |
| TrEMBL          | 41,965             | 93.84%            |
| eggNOG          | 36,370             | 81.32%            |
| NR              | 42,016             | 93.95%            |
| All Annotated   | 42,262             | 94.50%            |

**Note:** NR, NCBI non-redundant protein sequences; KEGG, Kyoto Encyclopedia of Genes and Genomes; KOG/COG/eggNOG, Clusters of Orthologous Groups of proteins; Pfam, Protein family; GO, Gene Ontology.

**Table S6. Twelve plant species used in comparative genomic analyses.**

| Index | Order        | Family name   | Species name                | Assembly accession number           |
|-------|--------------|---------------|-----------------------------|-------------------------------------|
| 1     | Amborellales | Amborellaceae | <i>Amborella trichopoda</i> | GCF_000471905.2_AMTR1.0             |
| 2     | Poales       | Poaceae       | <i>Oryza sativa</i>         | GCF_001433935.1_IRGSP-1.0           |
| 3     | Ranunculales | Ranunculaceae | <i>Aquilegia coerulea</i>   | GCA_002738505_Aquilegia_coerulea_v1 |
| 4     | Ranunculales | Ranunculaceae | <i>Coptis chinensis</i>     | GCA_015680905.1_ASM1568090v1        |
| 5     | Ranunculales | Papaveraceae  | <i>Papaver somniferum</i>   | GCF_003573695.1_ASM357369v1         |
| 6     | Ranunculales | Papaveraceae  | <i>Macleaya cordata</i>     | GCA_002174775.1_MC_HNAU_1.0         |
| 7     | Brassicales  | Brassicaceae  | <i>Arabidopsis thaliana</i> | GCF_000001735.4_TAIR10.1            |
| 8     | Vitales      | Vitaceae      | <i>Vitis vinifera</i>       | GCF_000003745.3_12X                 |
| 9     | Gentianales  | Rubiaceae     | <i>Coffea arabica</i>       | GCF_003713225.1_Cara_1.0            |
| 10    | Solanales    | Solanaceae    | <i>Solanum lycopersicum</i> | GCF_000188115.4_SL3.0               |
| 11    | Proteales    | Nelumbonaceae | <i>Nelumbo nucifera</i>     | GCF_000365185.1_Chinese_Lotus_1.1   |
| 12    | Ranunculales | Berberidaceae | <i>E. pubescens</i>         | The present study                   |

**Table S7. PCR primers for the amplification of different EpPT8 constructs.**

| Gene ID                     | Primer name | Sequence (5'-3')           |
|-----------------------------|-------------|----------------------------|
| <i>EpPT8</i> (first round)  | EpPT8Lf1    | GTGAGGGAGAGACACAGAAC       |
|                             | EpPT8Lr1    | CAACATAACACGCAGTCTCTC      |
| <i>EpPT8</i> (second round) | EpPT8Lf2    | AGCAGACAACAGCCATGGTT       |
|                             | EpPT8Lr2    | CAACATAACACGCAGTCTCTC      |
| <i>EpPT8</i>                | EpPT8Lf3    | CACCATGGTTTCTAGATGTGCTTCT  |
|                             | EpPT8Lr3    | TTAACCAACGAATGGAATGAGT     |
| <i>EpPT8</i> ΔTP82          | EpPT8Lf4Δ82 | CACCATGGCAACAAGTTCTGAAAAT  |
|                             | EpPT8Lr4Δ82 | TTAACCAACGAATGGAATGAGT     |
| <i>EpPT8</i> ΔTP32          | EpPT8Lf5Δ32 | CACCATGAAACCAGGAACCAGAATAC |
|                             | EpPT8Lr5Δ32 | TTAACCAACGAATGGAATGAGT     |

**Note:** *EpPT8*ΔTP82 and *EpPT8*ΔTP32, 82 and 32 amino acids truncated from the N terminus of *EpPT8*, respectively.

**Table S8. Summary of assembled contigs from ONT data.**

| <b>Assembly feature</b> | <b>Size (bp)</b> | <b>Number</b> |
|-------------------------|------------------|---------------|
| N90                     | 254,495          | 4,138         |
| N80                     | 389,708          | 3,022         |
| N70                     | 525,036          | 2,243         |
| N60                     | 692,316          | 1,657         |
| N50                     | 877,533          | 1,201         |
| Longest                 | 6,346,141        | N/A           |
| Total contigs           | 3,536,924,949    | 6,229         |

**Table S9. Characteristics of pseudo-chromosomes by Hi-C.**

| <b>Pseudo-chromosome</b> | <b>Anchored contigs</b> | <b>Anchored length (Mb)</b> | <b>Ordered contigs</b> | <b>Ordered length (Mb)</b> | <b>Gene number</b> |
|--------------------------|-------------------------|-----------------------------|------------------------|----------------------------|--------------------|
| Chr01                    | 1,152                   | 645.96                      | 952                    | 607.80                     | 7,579              |
| Chr02                    | 1,194                   | 615.34                      | 1,001                  | 586.90                     | 7,611              |
| Chr03                    | 1,132                   | 622.10                      | 926                    | 586.71                     | 7,446              |
| Chr04                    | 1,002                   | 575.86                      | 844                    | 548.07                     | 7,477              |
| Chr05                    | 879                     | 485.57                      | 759                    | 466.93                     | 6,739              |
| Chr06                    | 817                     | 460.22                      | 680                    | 437.45                     | 5,975              |
| Total                    | 6,176                   | 3,405.05                    | 5,162                  | 3,233.86                   | 42,827             |

**Table S10. Exon statistics from predicted gene models.**

| <b>Exon number</b>         | <b>Gene number</b> | <b>Percentage</b> |
|----------------------------|--------------------|-------------------|
| Transcripts with 1 exon    | 9,149              | 20.46%            |
| Transcripts with 2 exons   | 10,206             | 22.82%            |
| Transcripts with 3 exons   | 6,467              | 14.46%            |
| Transcripts with 4 exons   | 4,336              | 9.70%             |
| Transcripts with 5 exons   | 3,197              | 7.14%             |
| Transcripts with > 5 exons | 11,367             | 25.42%            |
| <b>Total</b>               | <b>44,722</b>      |                   |

**Table S11. Non-coding RNAs in *E. pubescens* genome.**

| <b>Pseudo-chromosome</b> | <b>Rrna</b>  | <b>miRNA</b> | <b>Trna</b>  | <b>snoRNA</b> | <b>snRNA</b> |
|--------------------------|--------------|--------------|--------------|---------------|--------------|
| Chr01                    | 474          | 25           | 879          | 91            | 31           |
| Chr02                    | 386          | 37           | 1,583        | 51            | 43           |
| Chr03                    | 262          | 24           | 869          | 35            | 177          |
| Chr04                    | 105          | 38           | 716          | 40            | 29           |
| Chr05                    | 121          | 15           | 852          | 11            | 39           |
| Chr06                    | 132          | 25           | 572          | 38            | 111          |
| Unassigned               | 233          | 8            | 323          | 12            | 28           |
| <b>Total</b>             | <b>1,713</b> | <b>172</b>   | <b>5,794</b> | <b>278</b>    | <b>458</b>   |

**Table S12. Identification of repetitive elements in *E. pubescens* genome.**

| Type                            | Number           | Length (bp)          | Coverage     |
|---------------------------------|------------------|----------------------|--------------|
| <b>Class I: Retroelement</b>    | <b>3,550,242</b> | <b>2,245,994,178</b> | <b>62.61</b> |
| Class I/DIRS                    | 1,460            | 219,668              | 0.01         |
| Class I/LINE                    | 227,819          | 87,492,563           | 2.44         |
| Class I/LTR/Cassandra           | 99               | 5,942                | 1.65E-06     |
| Class I/LTR/Caulimovirus        | 4,136            | 4,488,343            | 0.13         |
| Class I/LTR/Copia               | 243,224          | 178,735,444          | 4.98         |
| Class I/LTR/ERV                 | 52,190           | 8,771,265            | 0.24         |
| Class I/LTR/Gypsy               | 1,155,754        | 943,867,153          | 26.31        |
| Class I/LTR/Pao                 | 28,618           | 17,296,104           | 0.48         |
| Class I/LTR/Viper               | 175              | 15,711               | 4.38E-06     |
| Class I/SINE                    | 19,576           | 2,965,262            | 0.08         |
| Class I/LTR/Unknown             | 1,817,191        | 1,002,136,723        | 27.94        |
| <b>Class II: DNA transposon</b> | <b>466,973</b>   | <b>147,224,020</b>   | <b>4.10</b>  |
| Class II/Academ                 | 194              | 11,748               | 3.27E-06     |
| Class II/CACTA                  | 78,364           | 28,900,259           | 0.81         |
| Class II/Crypton                | 5,427            | 621,102              | 0.02         |
| Class II/Dada                   | 2,255            | 370,627              | 0.01         |
| Class II/Ginger                 | 2,460            | 237,447              | 0.01         |
| Class II/Helitron               | 11,155           | 6,184,166            | 0.17         |
| Class II/IS3EU                  | 1,380            | 101,886              | 2.84E-05     |
| Class II/Kolobok                | 5,470            | 1,199,699            | 0.03         |
| Class II/MITE                   | 1,033            | 125,957              | 3.51E-05     |
| Class II/Maverick               | 2,291            | 163,850              | 4.56E-05     |
| Class II/Merlin                 | 426              | 24,575               | 6.84E-06     |
| Class II/Mutator                | 23,547           | 16,615,931           | 0.46         |
| Class II/Novosib                | 2,372            | 197,352              | 0.01         |
| Class II/P                      | 3,236            | 262,167              | 0.01         |

**Continued**

| <b>Type</b>                     | <b>Number</b> | <b>Length (bp)</b> | <b>Coverage</b> |
|---------------------------------|---------------|--------------------|-----------------|
| <b>Class II: DNA transposon</b> | 583,950       | 276,608,409        | 7.92            |
| Class II/PIF-Harbinger          | 24,903        | 8,916,941          | 0.25            |
| Class II/PiggyBac               | 2,655         | 192,915            | 0.01            |
| Class II/Sola                   | 2,822         | 279,276            | 0.01            |
| Class II/Stowaway               | 1             | 48                 | 1.34E-08        |
| Class II/Tc1-Mariner            | 33,428        | 10,804,977         | 0.30            |
| Class II/Zator                  | 217           | 15,880             | 4.42E-06        |
| Class II/Zisupton               | 3,216         | 532,558            | 0.01            |
| Class II/Hat                    | 88,969        | 24,745,965         | 0.69            |
| Class II/Unknown                | 171,152       | 46,718,694         | 1.30            |
| <b>SSR</b>                      | 14,863        | 8,183,433          | 0.23            |
| <b>Total</b>                    | 4,032,078     | 2,401,401,631      | 66.94           |



**Table S13. LTR copia and LTR gypsy in 6 pseudo-chromosomes.**

| Pseudo-chromosome              | Gypsy       | Percentage | Copia       | Percentage |
|--------------------------------|-------------|------------|-------------|------------|
|                                | length (bp) | (%)        | length (bp) | (%)        |
| Chr01                          | 170,059,097 | 25.11      | 31,260,085  | 4.62       |
| Chr02                          | 163,092,995 | 25.28      | 33,060,954  | 5.12       |
| Chr03                          | 162,885,740 | 24.97      | 30,565,062  | 4.69       |
| Chr04                          | 152,844,065 | 25.31      | 28,881,589  | 4.78       |
| Chr05                          | 126,761,586 | 24.90      | 24,636,231  | 4.84       |
| Chr06                          | 120,064,765 | 24.88      | 24,645,457  | 5.11       |
| Unassigned                     | 48,158,905  |            | 5,686,066   |            |
| Total                          | 943,867,153 |            | 178,735,444 |            |
| Ratio of total Gypsy and Copia |             | 26.62      |             | 5.03       |

**Table S14. BUSCO evaluation of *E. pubescens* genome.**

| BUSCO annotation                | Number | Percentage |
|---------------------------------|--------|------------|
| Complete BUSCOs                 | 1,236  | 89.90%     |
| Complete and single-copy BUSCOs | 1,082  | 78.70%     |
| Complete and duplicated BUSCOs  | 154    | 11.20%     |
| Fragmented BUSCOs               | 47     | 3.40%      |
| Missing BUSCOs                  | 92     | 6.70%      |
| Total BUSCO groups searched     | 1,375  | 100.00%    |

**Note:** BUSCO, Benchmarking universal single-copy orthologs.

**Table S15. PTs of the UbiA superfamily used in the phylogenetic tree.**

| <b>Protein name</b> | <b>Substrates</b>             | <b>Plant species</b>              | <b>Accession ID</b> |
|---------------------|-------------------------------|-----------------------------------|---------------------|
| OsPPT1              | <i>p</i> -hydroxybenzoic acid | <i>Oryza sativa</i>               | BAE96574.1          |
| ZmPPT               |                               | <i>Zea mays</i>                   | NP_001148558.1      |
| AtPPT1              |                               | <i>Arabidopsis thaliana</i>       | NP_567688           |
| LePGT-1             |                               | <i>Lithospermum erythrorhizon</i> | BAB84122.1          |
| LePGT-2             |                               | <i>Lithospermum erythrorhizon</i> | BAB84123.1          |
| GmVTE2-1            | Homogentisate acid            | <i>Glycine max</i>                | ABB70126.1          |
| TaVTE2-1            |                               | <i>Triticum aestivum</i>          | ABB70123.1          |
| ZmVTE2-1            |                               | <i>Zea mays</i>                   | ABB70122.1          |
| CpVTE2-1            |                               | <i>Cuphea avigera</i>             | ABB70125.1          |
| AtVTE2-1            |                               | <i>Arabidopsis thaliana</i>       | AAM10489.1          |
| ApVTE2-1            |                               | <i>Allium ampeloprasum</i>        | ABB70124.1          |
| HvHGGT              |                               | <i>Hordeum vulgare</i>            | AAP43911.1          |
| OsHGGT              |                               | <i>Oryza sativa</i>               | AAP43913.1          |
| TaHGGT              |                               | <i>Triticum aestivum</i>          | AAP43912.1          |
| ZmHGGT              |                               | <i>Zea mays</i>                   | XP_008659772.1      |
| GmVTE2-2            |                               | <i>Glycine max</i>                | KRH71769.1          |
| OsVTE2-2            |                               | <i>Oryza sativa</i>               | XP_015646905.1      |
| ZmVTE2-2            |                               | <i>Zea mays</i>                   | NP_001146703.1      |
| DcVTE2-2            |                               | <i>Daucus carota</i>              | XP_017246707.1      |
| AtVTE2-2            |                               | <i>Arabidopsis thaliana</i>       | ABB70127.1          |
| AtrVTE2-2           |                               | <i>Amborella trichopoda</i>       | XP_011628799.1      |
| GmATG4              | Chlorophyllide a/b            | <i>Glycine max</i>                | NP_001239633.1      |
| OsATG4              |                               | <i>Oryza sativa</i>               | ABO31092.1          |
| ZmATG4              |                               | <i>Zea mays</i>                   | NP_001142204.1      |
| AtATG4              |                               | <i>Arabidopsis thaliana</i>       | NP_190750.1         |
| GmCOX10             | Haem B                        | <i>Glycine max</i>                | XP_003556552.1      |
| OsCOX10             |                               | <i>Oryza sativa</i>               | EEC70799.1          |
| AtCOX10             |                               | <i>Arabidopsis thaliana</i>       | NP_566019.1         |

Continued

| <b>Protein name</b> | <b>Substrates</b>              | <b>Species</b>               | <b>Accession ID</b> |
|---------------------|--------------------------------|------------------------------|---------------------|
| AtABC4              | 1,4-dihydroxy-2-naphthoic acid | <i>Arabidopsis thaliana</i>  | NP_001117518.1      |
| GmABC4              |                                | <i>Glycine max</i>           | XP_003532605.1      |
| OsABC4              |                                | <i>Oryza sativa</i>          | NP_001049226.1      |
| ZmABC4              |                                | <i>Zea mays</i>              | NP_001152170.1      |
| PcPT                | Coumarin                       | <i>Petroselinum crispum</i>  | BAO31627.1          |
| PsPT1               |                                | <i>Pastinaca sativa</i>      | AJW31563.1          |
| PsPT2               |                                | <i>Pastinaca sativa</i>      | AJW31564.1          |
| CIPT1               |                                | <i>Citrus limon</i>          | BAP27988.1          |
| FcPT1a              |                                | <i>Ficus carica</i>          | BBC82715.1          |
| GmC4DT              | Flavonoid                      | <i>Glycine max</i>           | BAW32575.1          |
| GmG2DT              |                                | <i>Glycine max</i>           | BAW32578.1          |
| GmG4DT              |                                | <i>Glycine max</i>           | BAH22520.1          |
| GmIDT1              |                                | <i>Glycine max</i>           | BAW32576.1          |
| GmIDT2              |                                | <i>Glycine max</i>           | BAW32577.1          |
| GmIDT3              |                                | <i>Glycine max</i>           | XP_014618511.1      |
| GmPT01              |                                | <i>Glycine max</i>           | NP_001335591.1      |
| GuA6DT              |                                | <i>Glycyrrhiza uralensis</i> | AIT11912.1          |
| GuILD1              |                                | <i>Glycyrrhiza uralensis</i> | AMR58303.1          |
| LaPT1               |                                | <i>Lupinus albus</i>         | AER35706.1          |
| LaPT2               |                                | <i>Lupinus albus</i>         | AWK21939.1          |
| LjG6DT              |                                | <i>Lotus japonicus</i>       | ARV85585.1          |
| PcM4DT              |                                | <i>Psoralea corylifolia</i>  | AYV64464.1          |
| SfFPT               |                                | <i>Sophora flavescens</i>    | AHA36633.1          |
| SfG6DT              |                                | <i>Sophora flavescens</i>    | BAK52291.1          |
| SfiLDT              |                                | <i>Sophora flavescens</i>    | BAK52290.1          |
| SfN8DT-1            |                                | <i>Sophora flavescens</i>    | BAG12671.1          |
| CsPT3               |                                | <i>Cannabis sativa</i>       | DAC76713.1          |
| CtIDT               |                                | <i>Cudrania tricuspidata</i> | AJD80983.1          |
| MaIDT               |                                | <i>Morus alba</i>            | AJD80982.1          |

Continued

| Protein name | Substrates     | Species                | Accession ID |
|--------------|----------------|------------------------|--------------|
| HIPT-1       | Phloroglucinol | <i>Humulus lupulus</i> | BAJ61049.1   |
| HIPT2        |                | <i>Humulus lupulus</i> | AJD80255.1   |

Note: PTs, prenyltransferases; UbiA, ubiquinone biosynthesis gene.

**Table S16. Comparison of enzymatic activity between EsPT2 and EpPT8**

| Substrate names | Conversion rate (%) |        |
|-----------------|---------------------|--------|
|                 | EpPT8               | EsPT2  |
| Kaempferol      | 71.02%              | 21.88% |
| Quercetin       | 34.81%              | 15.65% |

Note: Conversion rate was calculated as: peak area of reaction product/peak area of the sum of substrate and product.
